# Supplementary figures and images for: Can Alcohol Use Disorder Recovery Include Some Heavy Drinking? A Replication and Extension up to 9 Years Following Treatment
Source: PubMed Central journal article supplement — Alcohol Clin Exp Res. 2020 Aug 6;44(9):1862–74. doi: 10.1111/acer.14413 (PMC7540311; doi:10.1111/acer.14413), 2020-08-06

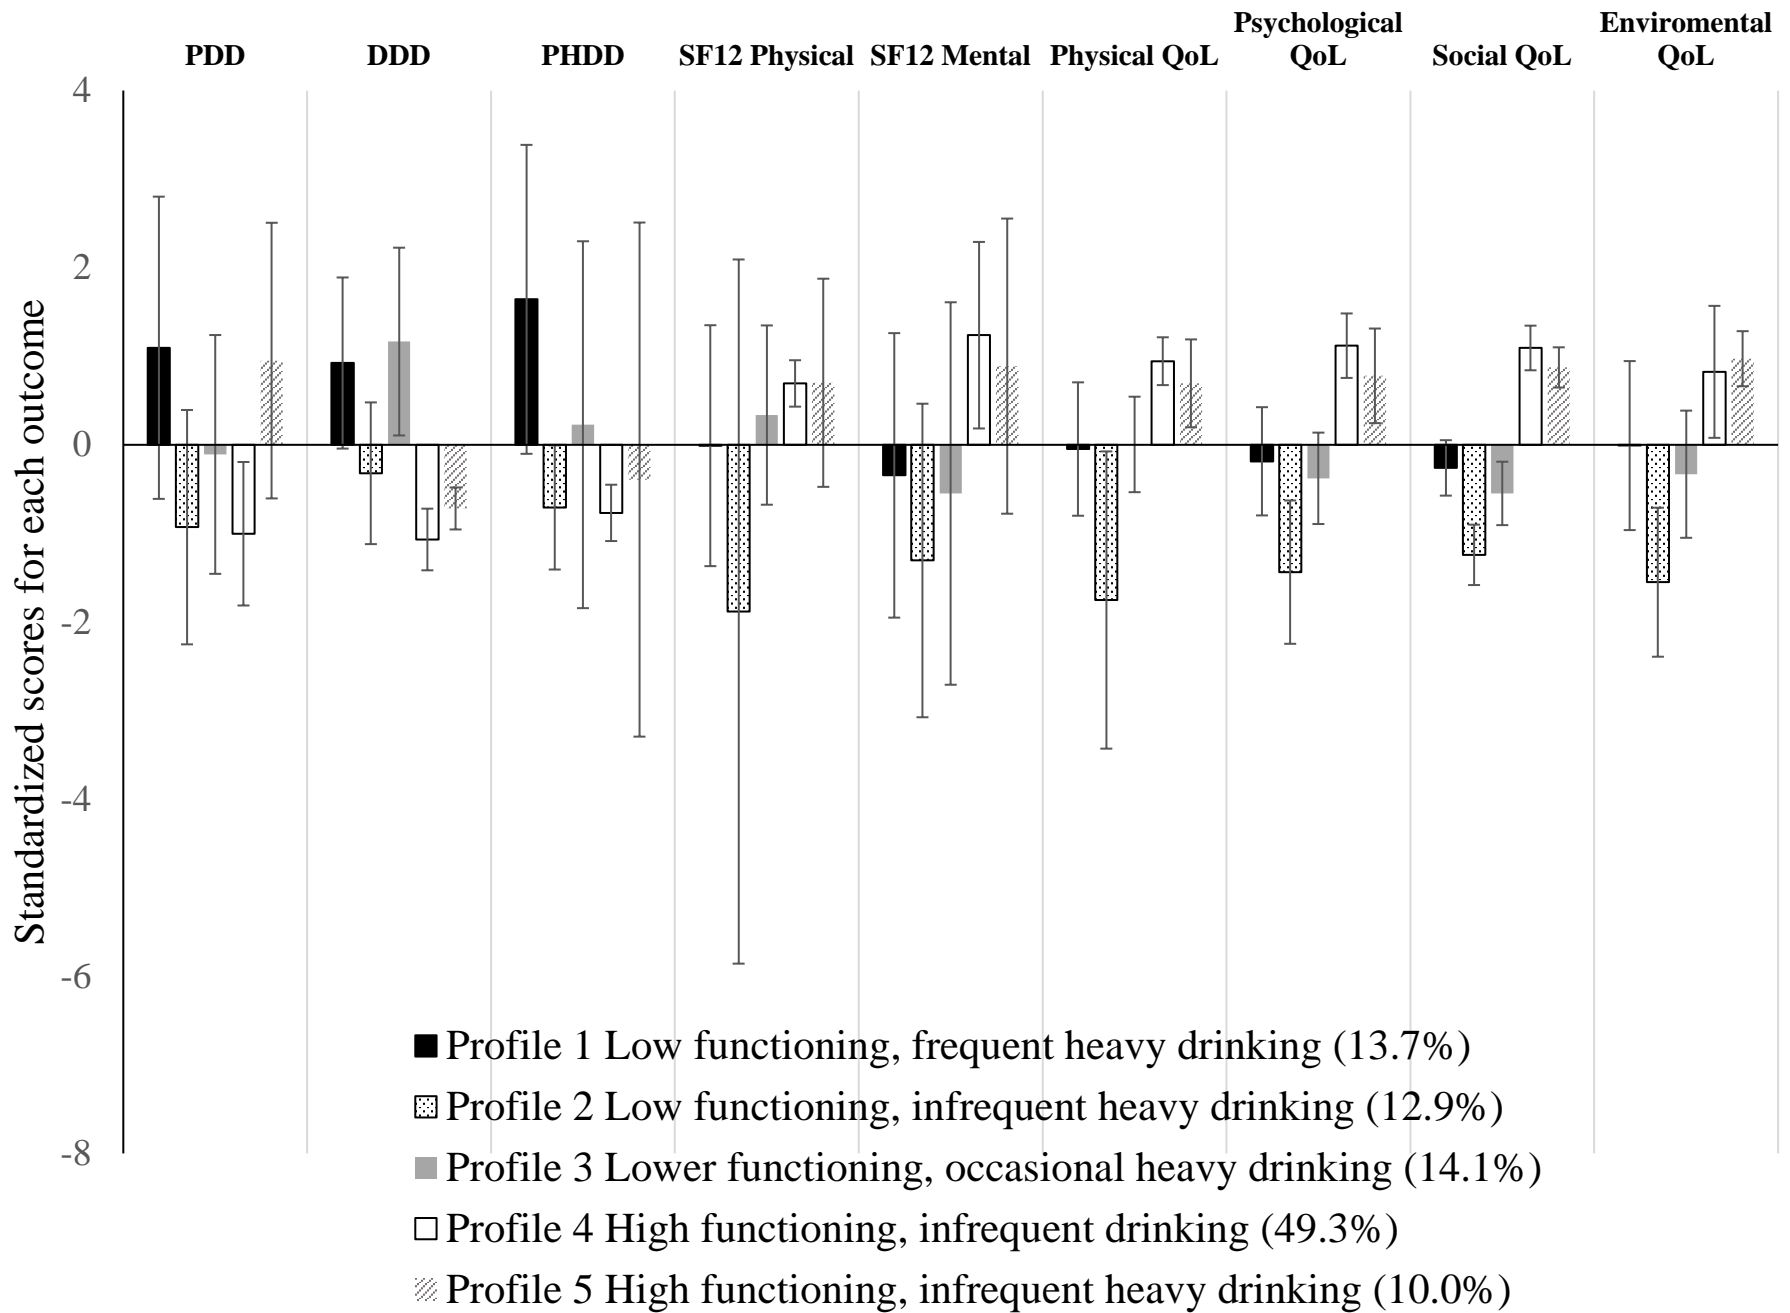

Supplement: ACER-44-1862-s001.pdf [file ACER-44-1862-s001.pdf]

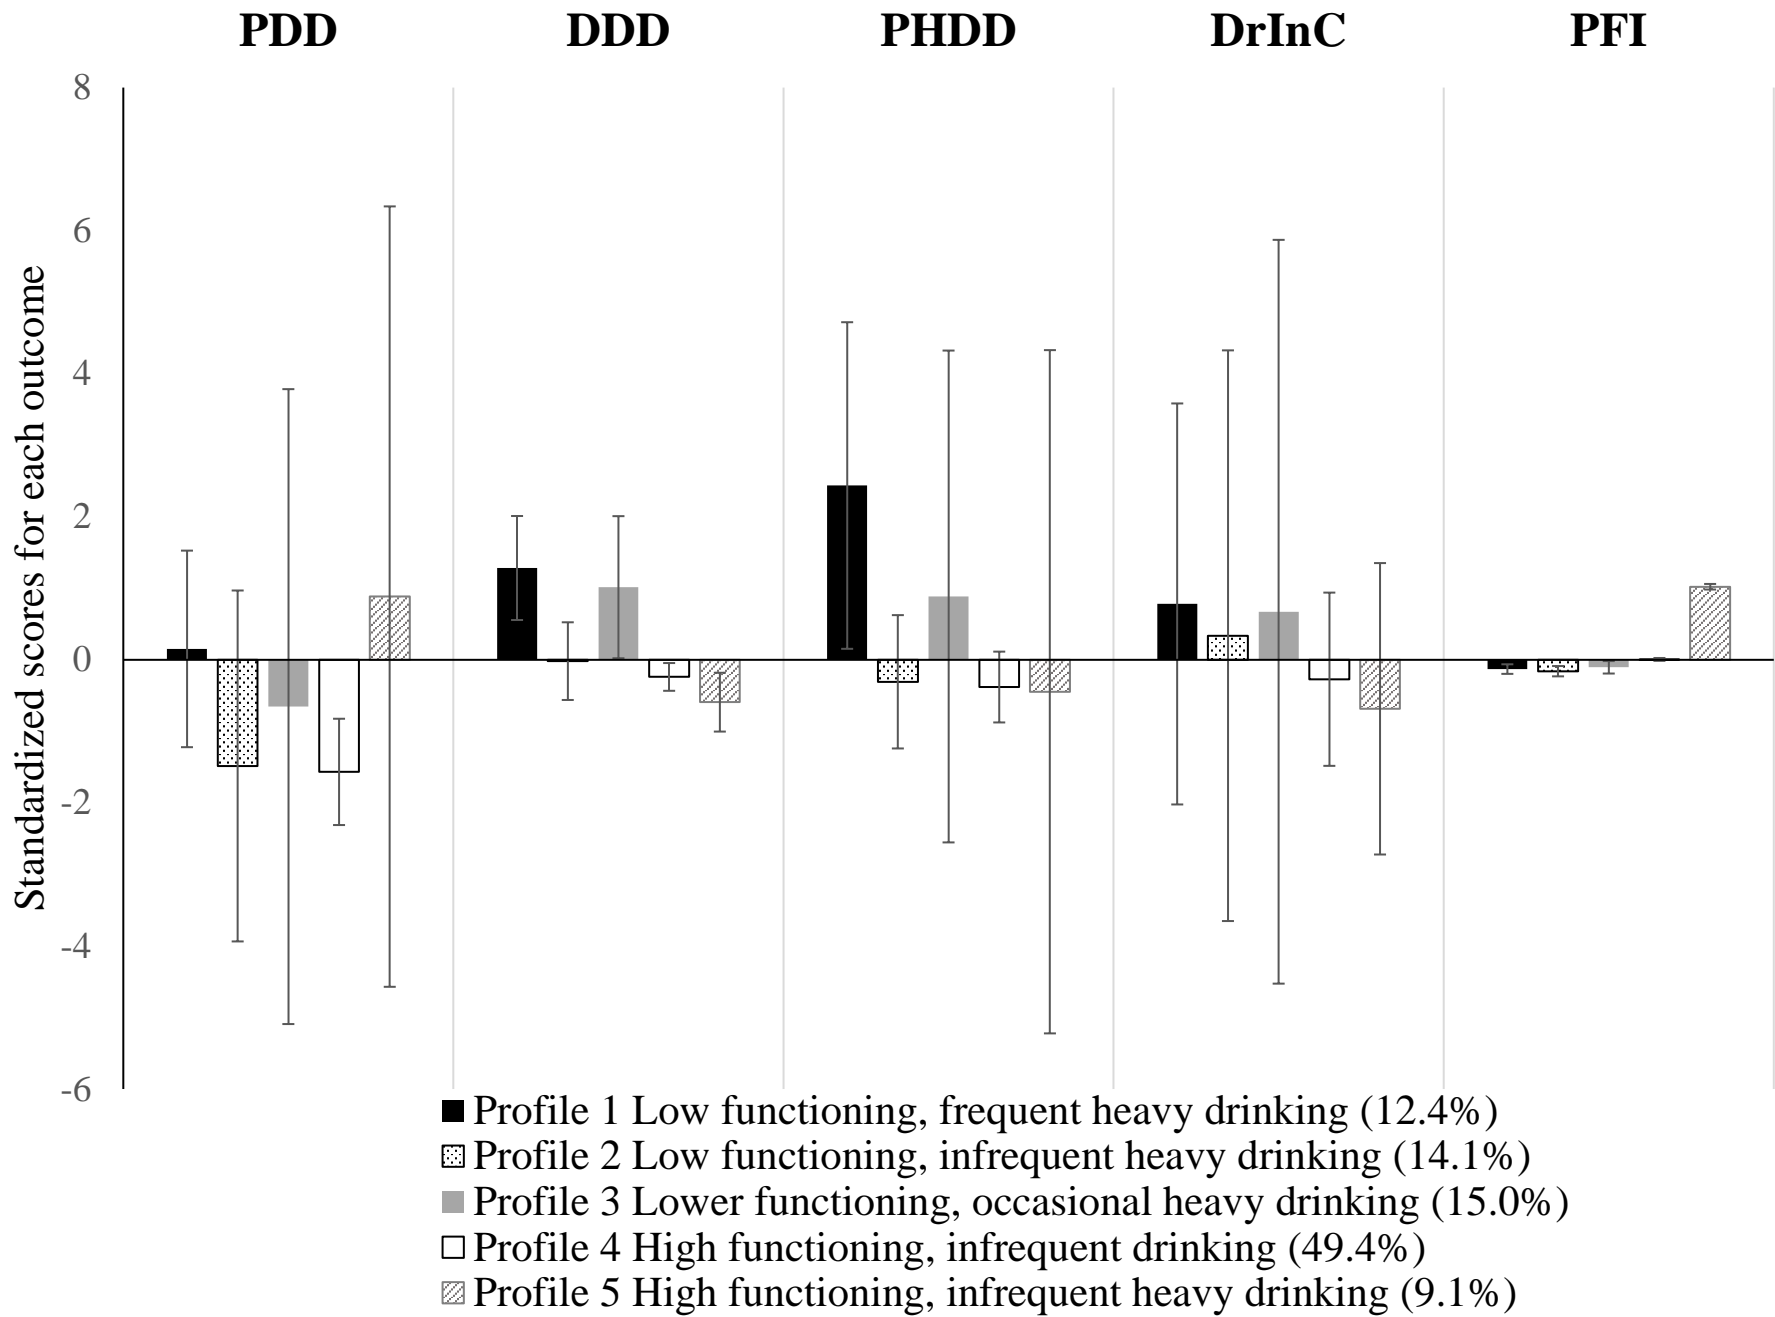

Supplement: ACER-44-1862-s002.pdf [file ACER-44-1862-s002.pdf]
